# Supplementary material for: Association of Atrial Fibrillation Episode Duration With Arrhythmia Recurrence Following Ablation: A Secondary Analysis of a Randomized Clinical Trial
Source: PubMed Central journal article supplement (PMC7333024; doi:10.1001/jamanetworkopen.2020.8748), 2020-07-02

## Supplementary Online Content

Andrade JG, Deyell MW, Verma A, et al. Association of atrial fibrillation episode duration with arrhythmia recurrence following ablation: a secondary analysis of a randomized clinical trial. *JAMA Netw Open*. 2020;3(7):e208748. doi:10.1001/jamanetworkopen.2020.8748

### **eFigure.** Study Flow Diagram

This supplementary material has been provided by the authors to give readers additional information about their work.

**eFigure. Study Flow Diagram**

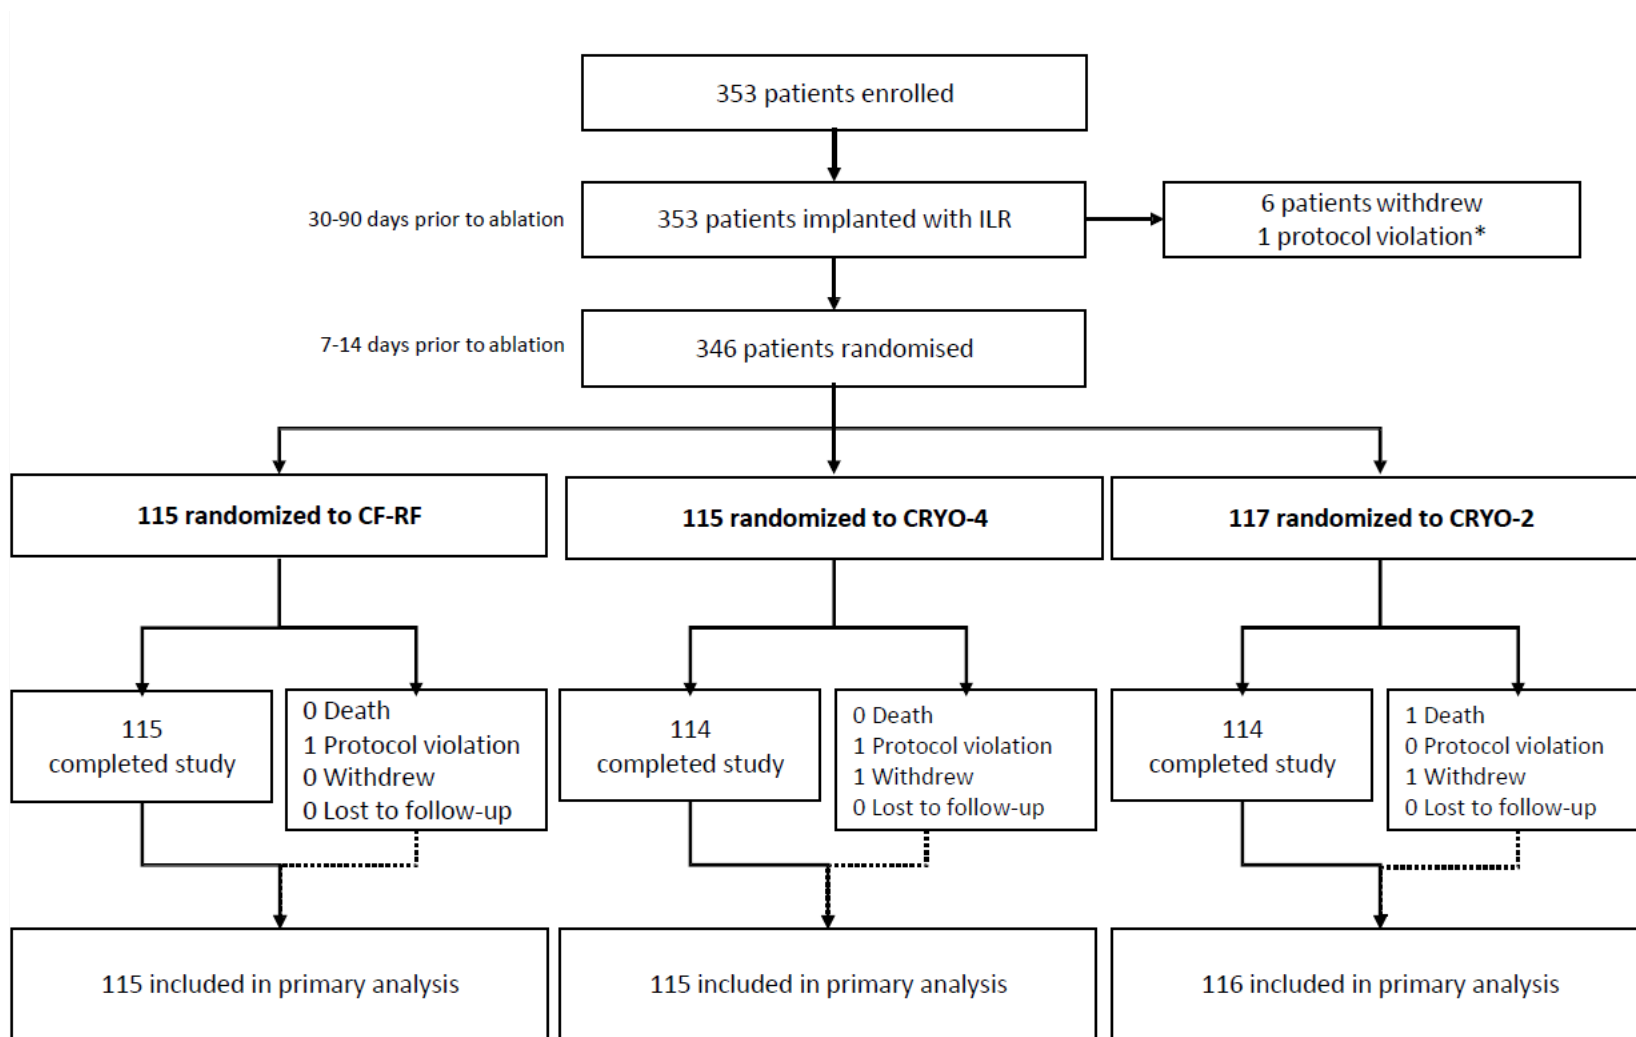

Supplement: jamanetwopen-3-e208748-s002.pdf [file jamanetwopen-3-e208748-s002.pdf]
