# Supplementary material for: Association of Atrial Fibrillation Episode Duration With Arrhythmia Recurrence Following Ablation: A Secondary Analysis of a Randomized Clinical Trial
Source: PubMed Central journal article supplement (PMC7333024; doi:10.1001/jamanetworkopen.2020.8748), 2020-07-02
Supplement: jamanetwopen-3-e208748-s003.pdf [file jamanetwopen-3-e208748-s003.pdf]

## Data Sharing Statement

Andrade. Association of Atrial Fibrillation Episode Duration With Arrhythmia Recurrence Following Ablation: A Secondary Analysis of a Randomized Clinical Trial. *JAMA Netw Open*. Published July 2, 2020. 10.1001/jamanetworkopen.2020.8748

### Data

**Data available:** Yes

**Data types:** Deidentified participant data

**How to access data:** [jason.andrade@vch.ca](mailto:jason.andrade@vch.ca)

**When available:** December 31, 2020

### Supporting Documents

**Document types:** None

### Additional Information

**Who can access the data:** Reasonable data access requests will be considered by the steering committee

**Types of analyses:** Reasonable data access requests will be considered by the steering committee

**Mechanisms of data availability:** Reasonable data access requests will be considered by the steering committee
